1 **Increased theta/alpha synchrony in the habenula-prefrontal network with negative**  
2 **emotional stimuli in human patients**

3 Yongzhi Huang<sup>1,2\*</sup>, Bomin Sun<sup>3\*</sup>, Jean Debarros<sup>4</sup>, Chao Zhang<sup>3</sup>, Shikun Zhan<sup>3</sup>, Dianyou Li<sup>3</sup>,  
4 Chencheng Zhang<sup>3</sup>, Tao Wang<sup>3</sup>, Peng Huang<sup>3</sup>, Yijie Lai<sup>3</sup>, Peter Brown<sup>4</sup>, Chunyan Cao<sup>3†</sup>,  
5 Huiling Tan<sup>4†</sup>

6 <sup>1</sup> Academy of Medical Engineering and Translational Medicine, Tianjin University, Tianjin,  
7 300072, China

8 <sup>2</sup> Nuffield Department of Surgical Sciences, University of Oxford, Oxford OX3 9DU, UK

9 <sup>3</sup> Center of Functional Neurosurgery, Ruijin Hospital, Shanghai Jiao Tong University School of  
10 Medicine, Shanghai 200025, China

11 <sup>4</sup> Medical Research Council (MRC) Brain Network Dynamics Unit at the University of Oxford,  
12 Nuffield Department of Clinical Neurosciences, University of Oxford, Oxford OX3 9DU, UK

13 \* These authors contributed equally to this work

14 † Corresponding author.

15 Address correspondence to:

16 Huiling Tan, 6th Floor West Wing JR Hospital, MRC Brain Network Dynamics Unit, Nuffield  
17 Department of Clinical Neurosciences, University of Oxford, Oxford OX3 9DU, UK; Phone:  
18 (+44) 01865-572483; Email: [huiling.tan@ndcn.ox.ac.uk](mailto:huiling.tan@ndcn.ox.ac.uk);

19 or Chunyan Cao, Center of Functional Neurosurgery, Ruijin Hospital, Shanghai Jiao Tong  
20 University School of Medicine, Shanghai 200025, China; Email: [ccy40646@rjh.com.cn](mailto:ccy40646@rjh.com.cn)

21

22 **Abstract**

23 Lateral habenula is believed to encode negative motivational stimuli and plays key roles in the  
24 pathophysiology of psychiatric disorders. However, how habenula activities are modulated  
25 during the perception and processing of emotional information is still poorly understood. We  
26 recorded local field potentials from bilateral habenula areas with simultaneous cortical  
27 magnetoencephalography in nine patients with psychiatric disorders during an emotional  
28 picture viewing task. Oscillatory activity in the theta/alpha band (5-10 Hz) within the  
29 habenula and prefrontal cortical regions, as well as the coupling between these structures, are  
30 increased during the perception and processing of negative emotional stimuli compared to  
31 positive emotional stimuli. The evoked increase in theta/alpha band synchronization in the  
32 frontal cortex-habenula network correlated with the emotional valence not the arousal score of  
33 the stimuli. These results provide direct evidence for increased theta/alpha synchrony within  
34 the habenula area and prefrontal cortex-habenula network in the perception of negative  
35 emotion in human participants.

36

37 **Keywords:** habenula, prefrontal cortex-habenula network, emotional stimuli, theta / alpha  
38 oscillations, deep brain stimulation

39

## 40 **Introduction**

41 The habenula is an epithalamic structure that functionally links the forebrain with the  
42 midbrain structures that are involved in the release of dopamine (i.e., the substantia nigra pars  
43 compacta and the ventral tegmental area) and serotonin (i.e., raphe nucleus) (Wang and  
44 Aghajanian, 1977; Herkenham and Nauta, 1979; Hikosaka *et al.*, 2008; Hong *et al.*, 2011;  
45 Proulx *et al.*, 2014; Hu *et al.*, 2020). As a region that could influence both the dopaminergic  
46 and serotonergic systems, the habenula is thought to play a key role in not only sleep and  
47 wakefulness but also in regulating various emotional and cognitive functions. Animal studies  
48 showed that activities in lateral habenula increased during the processing of aversive  
49 stimulus events such as omission of predicted rewards and stimuli provoking anxiety, stress,  
50 pain, and fear (Matsumoto and Hikosaka, 2007; Hikosaka, 2010; Yamaguchi *et al.*, 2013; Hu  
51 *et al.*, 2020).

52 Hyperexcitability and dysfunction of the lateral habenula (LHb) have been implicated in the  
53 development of psychiatric disorders including depressive disorder and bipolar disorders  
54 (Fakhoury, 2017; Yang *et al.*, 2018b). In rodents, LHb firing rate and metabolism is elevated  
55 in parallel with depressive-like phenotypes such as reduction in locomotor and rearing  
56 behaviors (Caldecott-Hazard *et al.*, 1988), and also increases during acquisition and recall of  
57 conditioned fear (Gonzalez-Pardo *et al.*, 2012). High-resolution magnetic resonance imaging  
58 in patients has also revealed smaller habenula volume in patients with depressive and bipolar  
59 disorders (Savitz *et al.*, 2011). Other evidence suggests that dysfunction of the LHb is  
60 involved in different cognitive disorders, such as schizophrenia (Shepard *et al.*, 2006) and

61 addiction (Velasquez *et al.*, 2014). More direct evidence of the involvement of the LHb in  
62 psychiatric disorders in humans comes from deep brain stimulation (DBS) of the LHb that has  
63 potential therapeutic effects in treatment-resistant depression, bipolar disorder, and  
64 schizophrenia (Sartorius *et al.*, 2010; Zhang *et al.*, 2019; Wang *et al.*, 2020). However, how  
65 habenula activities are modulated during the processing of emotional information in humans  
66 is still poorly understood.

67 The processing of emotional information is crucial for an individual's mental health and has a  
68 substantial influence on social interactions and different cognitive processes. Dysfunction and  
69 dysregulation of emotion-related brain circuits may precipitate mood disorders (Phillips *et al.*,  
70 2003b). Investigating the neural activities in response to emotional stimuli in the cortical-  
71 habenula network is crucial to our understanding of emotional information processing in the  
72 brain. This might also shed light on how to modulate habenula in the treatment of psychiatric  
73 disorders. In this study, we utilize the unique opportunity offered by DBS surgery targeting  
74 habenula as a potential treatment for psychiatric disorders. We measured local field potentials  
75 (LFPs) from the habenula area using the electrodes implanted for DBS in patients during a  
76 passive emotional picture viewing task (Fig. 1; Materials and Methods). Whole brain  
77 magnetoencephalography (MEG) was simultaneously recorded. This allowed us to investigate  
78 changes in the habenula neural activity and its functional connectivity with cortical areas  
79 induced by the stimuli of different emotional valence. The high temporal resolution of the  
80 LFP and MEG measurements also allowed us to evaluate how local activities and cross-region  
81 connectivity change over time in the processing of emotional stimuli. Previous studies on  
82 rodent models of depression showed that, during the depression-like state in rodents, LHb

83 neuron firing increased with the mean firing rate at the theta band (Li *et al.*, 2011) and LHb  
84 neurons fire in bursts and phase locked to local theta band field potentials (Yang *et al.*,  
85 2018a). Therefore, we hypothesize that theta band activity in the habenula LFPs in humans  
86 would increase in response to negative emotional stimuli.

87

## 88 **Results**

### 89 **Spontaneous oscillatory activity in the habenula during rest includes theta/alpha** 90 **activity**

91 Electrode trajectories and contact positions of all recorded patients in this study were  
92 reconstructed using the Lead-DBS toolbox (Horn and Kuhn, 2015) and shown in Fig. 2A. The  
93 peak frequency of the oscillatory activities during rest for each electrode identified using the  
94 Fitting Oscillations and One-Over-F (FOOOF) algorithm (Haller *et al.*, 2018; Donoghue *et*  
95 *al.*, 2020) is presented in Table 1. We detected the power of oscillatory activities peaking in  
96 the theta/alpha frequency range (here defined as 5-10 Hz) in 13 out of the 18 recorded  
97 habenula during rest, compared to 7 of the 18 recorded habenula with peaks in beta band (12-  
98 30 Hz). The average peak frequency was  $8.2 \pm 1.1$  Hz for theta/alpha, and  $15.1 \pm 1.8$  Hz for  
99 beta band (Fig. 2B). Three out of the 18 recorded habenula showed oscillatory activities in  
100 both theta/alpha and beta bands. Fig. 2D-F shows the position of the electrodes with only  
101 theta/alpha band peaks, with only beta peaks in both sides (Case 3), with both theta/alpha and  
102 beta band peaks during rest (Case 6), respectively. The electrodes from which only alpha/theta  
103 peaks were detected are well placed in the habenula area.

104

105 **Habenular theta/alpha activity is differentially modulated by stimuli with positive**  
106 **and negative emotional valence**

107 The power spectra normalized to the baseline activity (-2000 to -200 ms) showed a significant  
108 event-related synchronization (ERS) in the habenula spanning across 2-30 Hz from 50 to 800  
109 ms after the presentation of all stimuli ( $p_{\text{cluster}} < 0.05$ , Fig. 3A-C). Permutation tests was  
110 applied to the power-spectra in response to the negative and positive emotional pictures from  
111 all subjects. This identified two clusters with significant difference for the two emotional  
112 valence conditions: one in the theta/alpha range (5-10 Hz) at short latency (from 100 to 500  
113 ms, Fig. 3D and 3E) after stimulus presentation and another in the theta range (4-7 Hz) at a  
114 longer latency (from 2700 to 3300 ms, Fig. 3D and 3F), with higher increase in the identified  
115 frequency bands with negative stimuli compared to positive stimuli in both clusters. The  
116 power of the activity at the identified frequency band for the neutral condition sits between  
117 the values for the negative condition and positive condition in both identified time windows  
118 (Fig. 3G-H).

119

120 **Theta/Alpha oscillations in the prefrontal cortex are also differentially modulated**  
121 **by stimuli with positive and negative emotional valence**

122 For cortical activities measured using MEG, we first computed the time-frequency power  
123 spectra normalized to the baseline activity (-2000 to -200 ms) averaged across all MEG  
124 frontal sensors highlighted in the Fig. 4A for different stimulus emotional valence conditions

125 for each recorded participant. The average power spectra across all participants for different  
126 valence conditions are shown in Fig. 4B. Permutation test applied to the power-spectra in  
127 response to the negative and positive emotional pictures from all subjects identified clusters  
128 with significant differences ( $p_{\text{cluster}} < 0.05$ ) in the theta/alpha range at short latency (from 100  
129 to 500 ms after stimulus onset) (Fig. 4C). Subsequent analysis of power changes over the  
130 identified frequency band (5-10 Hz) and time window (100-500 ms) confirmed significantly  
131 increased activity with negative stimuli in frontal sensors only (Fig. 4D).

132 Next, we used a frequency domain beamforming approach to identify the source of the  
133 difference in theta/alpha reactivity within the 100-500 ms time window at the corrected  
134 significance threshold of  $p < 0.05$ . We found two main significant source peaks with one in  
135 the right prefrontal cortex (corresponding to Brodmann area 10, MNI coordinate [16, 56, 0]; t-  
136 value = 4.14,  $p = 0.046$ , corrected) and the other in the left prefrontal cortex (corresponding  
137 to Brodmann area 9, MNI coordinate [-32, 38, 28]; t-value = 3.21,  $p = 0.046$ , corrected) (Fig.  
138 5). No voxels within identified areas in Figure 5 showed any significant difference in the pre-  
139 cue baseline period, suggesting that the observed difference in the theta/alpha power reactivity  
140 was not due to difference in the baseline power between the two emotional valence  
141 conditions.

142

143 **Cortical-habenular coherence is also differentially modulated by stimuli with**  
144 **positive and negative emotional valence**

145 In addition, we asked how the coupling between habenula and cortex in the theta/alpha

146 activity are modulated over time in the task and how the coupling changes with the valence of  
147 the presented stimuli. The time-varying coherence between each MEG sensor and the  
148 habenula LFP was first calculated for each individual trial, and then averaged across all MEG  
149 sensors and across trials in each emotional valence condition for each habenula. Comparing  
150 the time-varying cortical-habenula coherence for the negative and positive emotional valence  
151 conditions across all recorded habenula showed increased coherence with negative stimulus in  
152 the theta/alpha band (5-10 Hz) in the time window of 800-1300 ms ( $N = 16$ , Fig. 6A).  
153 Subsequent statistical analysis of the coherence changes in this frequency band and selected  
154 time window (800-1300 ms) across the scalp revealed significant increased coherence with  
155 negative stimuli over right frontal and temporal areas (Fig. 6B). Linear mixed-effect  
156 modelling confirmed significant effect of the increase in the theta/alpha band prefrontal cortex  
157 (PFC)-habenular coherence (relative to the pre-stimulus baseline) during this time window  
158 (800-1300 ms) on the theta activity increase in the habenula at the later time window (2700-  
159 3300 ms after stimuli onset) ( $k = 0.2434 \pm 0.1031$ ,  $p = 0.0226$ ,  $R^2 = 0.104$ ; Fig. 6C).  
160 Source localization of the theta/alpha habenula-cortical coherence difference for negative and  
161 positive stimuli revealed that theta/alpha coherence was higher with negative stimuli in right  
162 frontal regions, indicated in Fig. 6D. The location of the peak t-statistic (t-value = 5.73,  $p =$   
163 0.001, uncorrected) corresponds to MNI coordinate [10, 64, 12] and the region encompasses  
164 right medial prefrontal cortex.

165

166 **Increased theta/alpha synchrony in the PFC-habenula network correlated with**



167 **emotional valence, not arousal**

168 It should be noted that there was co-variation between emotional valence and arousal in the  
169 stimuli presented (Fig. 1B), and previous studies have shown that some neural activity  
170 changes in response to the viewing of affective pictures can be mediated by the effect of  
171 stimulus arousal (Huebl *et al.*, 2014; Huebl *et al.*, 2016). Therefore, we used linear mixed-  
172 effect modelling to assess whether the increased theta/alpha oscillations we observed in the  
173 habenula, the prefrontal cortex (PFC) and in the PFC-habenula coherence in response to the  
174 viewing of negative compared to positive emotional pictures should be attributed to the  
175 emotional valence or the stimulus arousal. The models identified significant fixed effects of  
176 valence on all the reported changes in the PFC-habenula network, but there was no effect of  
177 arousal (Table 2 for the modelling and results). The negative effects of valence indicate that  
178 the lower the emotional valence score (more negative) of the presented stimuli, the higher the  
179 theta/alpha increase within the habenula, the PFC and in the PFC-habenula theta band  
180 coherence.

181

182 **Discussion**

183 This study has showed that oscillatory activities in the theta/alpha frequency band within the  
184 habenula and prefrontal cortical regions, as well as the connectivity between these structures  
185 in the same frequency band, are modulated in an emotional picture viewing task in human  
186 participants. Compared with positive emotional stimuli, negative emotional stimuli were  
187 associated with higher increase in theta/alpha oscillation in both habenula and bilateral frontal

188 cortex with a short latency (from 100 to 500 ms) after stimulus onset. Furthermore, higher  
189 theta/alpha coherence between habenula and right prefrontal cortex was observed at 800 –  
190 1300 ms after the stimulus onset, which was correlated with another increase in theta power in  
191 the habenula with a long latency (from 2700 to 3300 ms) after stimulus onset. These changes  
192 correlated with the emotional valence but not with the stimulus arousal of the presented  
193 figures. These activity changes at different time windows may reflect the different  
194 neuropsychological processes underlying emotion perception including identification and  
195 appraisal of emotional material, production of affective states, and autonomic response  
196 regulation (Phillips *et al.*, 2003a). This is the first study, to our knowledge, implicating  
197 increased theta band activities in the habenula-PFC network in negative emotions in human  
198 patients.

199

## 200 **Habenula theta/alpha oscillations in negative emotional processing and major** 201 **depression**

202 The lateral habenula (LHb) has shown consistent hyperactivity in multiple animal models of  
203 depression-like phenotypes (Hu *et al.*, 2020). Increased LHb activities have been observed  
204 during omission of a predicted reward, depressive-like phenotype, fear or stress (Matsumoto  
205 and Hikosaka, 2009; Bromberg-Martin and Hikosaka, 2011; Wang *et al.*, 2017). Furthermore,  
206 manipulations enhancing or suppressing LHb activity in rodents lead to depressive-like or  
207 antidepressant effects, respectively (Li *et al.*, 2013; Lecca *et al.*, 2016; Cui *et al.*, 2018; Yang  
208 *et al.*, 2018a). Increased activation of the lateral habenula inhibits dopamine neurons (Ji and

209 Shepard, 2007; Hikosaka, 2010) and allows avoidance of threatening or unpleasant  
210 confrontations (Shumake *et al.*, 2010; Friedman *et al.*, 2011). In accordance with findings in  
211 animal models, several studies have provided evidence for habenula hyperactivity in human  
212 subjects with depressive disorders (Morris *et al.*, 1999; Lawson *et al.*, 2017).

213 To our knowledge, this is the first study showing increased oscillatory activity in the habenula  
214 in the theta/alpha frequency band with perception of negative emotion in human participants.  
215 This is consistent with previous findings that LHb neurons in rodents in the depressive-like  
216 state showed increased firing with a mean firing rate in the theta frequency band (Li *et al.*,  
217 2011), and that ketamine reversed both the increase in theta activity in the habenula and  
218 depressive-like behavior in rodents (Yang *et al.*, 2018a). The results in this study are also  
219 consistent with recent research showing that acute 5 Hz deep brain stimulation of the lateral  
220 habenula is associated with depressive-like behavior such as increased duration of immobility  
221 in a forced swim test in rodents (Jakobs *et al.*, 2019). Possibly due to the limited sample size,  
222 we didn't observe any correlation between the habenula theta/alpha activities and the Beck  
223 Depression Inventory score or Hamilton Depression Rating Scale score measured before the  
224 surgery across patients in this study. It therefore remains to be established whether hyper-  
225 synchrony in the theta band in habenula might be associated with the development of  
226 depressive symptoms in human patients.

227

## 228 **Prefrontal cortex-habenular coherence in negative emotional processing**

229 Apart from increased theta/alpha band synchronization within the bilateral habenula and

230 prefrontal cortex, our data showed that negative emotional stimuli induced increased  
231 theta/alpha coherence between the habenula and the right prefrontal cortex. The increased  
232 rPFC-habenular coherence correlated with further increase of theta activities within the  
233 habenula at a later latency. These results suggest a specific role of the theta/alpha  
234 synchronization between habenula and frontal cortex in the perception of negative emotional  
235 valence. Previous studies have showed that LHb receives input from cortical areas processing  
236 information about pain, loss, adversities, bad, harmful or suboptimal choices, such as the  
237 anterior insula and dorsal ACC (dACC) and the pregenual ACC (pgACC) (Vadovicova,  
238 2014). Our data is consistent with the hypothesis that PFC-to-habenular projections provide a  
239 teaching signal for value-based choice behavior, helping to learn to avoid potentially harmful,  
240 low valued or wrong choices (Vadovicova, 2014).

241 Our data also showed that the increase of PFC-habenular coherence during the presentation of  
242 negative emotional stimuli were mainly located in the right frontal cortex. Many studies have  
243 investigated how both hemispheres have a role in emotional processing. The Right  
244 Hemisphere Hypothesis (RHH) suggests that the right hemisphere would be involved, more  
245 than the left hemisphere, in the processing of all emotional stimuli, irrespective of their  
246 emotional valence (Gainotti, 2012). On the other hand, the Valence Hypothesis (VH) posits  
247 that the left and the right hemispheres would be specialized in processing positive and  
248 negative emotions, respectively (Davidson, 1992; Wyczesany *et al.*, 2018). The latter  
249 hypothesis has also been supported by studies of brain lesion (Starkstein *et al.*, 1987; Morris  
250 *et al.*, 1999), electroencephalography (EEG) (Davidson, 1992; Wyczesany *et al.*, 2018),  
251 transcranial magnetic stimulation (TMS) (Pascual-Leone *et al.*, 1996) and functional

252 neuroimaging (Canli *et al.*, 1998; Beraha *et al.*, 2012) in the prefrontal cortex. Our findings  
253 suggest a more important role of the functional connectivity between the right frontal cortex  
254 and habenula for the processing of negative emotions.

255

## 256 **Implications for the development of DBS therapy**

257 Although the exact underlying physiological mechanism of DBS remains elusive, high  
258 frequency DBS delivered to STN and GPi can reduce the firing rates of local neurons (Boraud  
259 *et al.*, 1996; Welter *et al.*, 2004) and suppress the hypersynchrony of oscillatory activities in  
260 the beta frequency band in the network leading to symptom alleviation (Kuhn *et al.*, 2008;  
261 Oswal *et al.*, 2016) for Parkinson's disease. In addition, high frequency DBS may also  
262 dissociate input and output signals, resulting in the disruption of abnormal information flow  
263 through the stimulation site (Chiken and Nambu, 2016). This is supported by recent studies  
264 showing that patient specific connectivity profiles between the stimulation target and area of  
265 interest in the cortex can predict clinical outcome of deep brain stimulation for Parkinson  
266 disease (Horn *et al.*, 2017), major depressive disorder (MDD) (Riva-Posse *et al.*, 2014) and  
267 obsessive-compulsive disorder (Baldermann *et al.*, 2019). Our results suggest that increased  
268 theta oscillatory activity in the habenula and increased theta/alpha coherence between  
269 prefrontal cortex and habenula are associated with negative emotional valence in human  
270 patients. High frequency DBS targeting habenula may be beneficial for treatment-resistant  
271 MDD by inhibiting possible hyperactivity and theta band over-synchrony of neuronal  
272 activities in the habenula, and by disrupting the information flow from the prefrontal cortex to

273 other midbrain areas through the habenula. It remains to be explored whether theta band  
274 synchronization can be used as a biomarker for closed loop habenula deep brain stimulation  
275 for better treatment of MDD.

276

## 277 **Limitations**

278 The response to emotional tasks is likely to be altered in patients with pathological mood  
279 states compared to healthy subjects. This study cannot address whether the emotional valence  
280 effect we observed is specific to psychiatric disorders or is a common feature of healthy  
281 emotional processing. Another caveat we would like to acknowledge is that the human  
282 habenula is a small region compared to the size of the electrode contact used for recording  
283 (Fig. 2A). Considering that the location of habenula is adjacent to the posterior end of the  
284 medial dorsal thalamus, we may have captured activities from the medial dorsal thalamus. In  
285 addition, it should also be noted that a post-operative stun effect cannot be excluded, which  
286 could interfere with neural recordings, considering that the experiment took place only a few  
287 days after electrode implantation.

288

## 289 **Conclusion**

290 In this study, we exploited the high temporal resolution of LFP and MEG measurements and  
291 observed an emotional valence effect in local activities and in cross-region coherence in the  
292 cortical-habenula network in different time windows. Our results provide evidence for the role

293 of oscillatory activity in the theta/alpha frequency band within the habenula and prefrontal  
294 cortical regions, as well as of theta/alpha coherence between these structures in the processing  
295 and experiencing of negative emotions in human patients.

296

## 297 **Materials and Methods**

### 298 **Participants**

299 Nine patients (6 males, aged 16 – 44, more details in Table 1) were recruited for this study,  
300 who underwent bilateral DBS surgery targeting the habenula as a clinical trial for treatment-  
301 resistant major depression (ClinicalTrials.gov Identifier: NCT03347487) or as a pilot study  
302 for intractable schizophrenia or bipolar disorders. All participants gave written informed  
303 consent to the current study, which was approved by the local ethics committee of Ruijin  
304 hospital, Shanghai Jiao Tong University School of Medicine in accordance with the  
305 declaration of Helsinki. The surgical procedure has been previously described (Zhang *et al.*,  
306 2019). The electrode position, stimulation parameters and clinical outcome in Case 1 have  
307 been separately reported (Wang *et al.*, 2020).

308

### 309 **Deep Brain Stimulation Operation**

310 Implantation of the quadripolar DBS electrodes (model 3389 (contact: 1.5 mm, distance:  
311 0.5mm, diameter: 1.27 mm); Medtronic, Minneapolis, MN, USA) was performed under  
312 general anesthesia bilaterally using a MRI-guided targeting (3.0 T, General Electric,

313 Waukesha, WI, USA). The MRI was co-registered with a CT image (General Electric,  
314 Waukesha, WI, USA) with the Leksell stereotactic frame to obtain the coordinate values  
315 (Zhang *et al.*, 2019). The electrode leads were temporary externalized for one week.

316

## 317 **Paradigm**

318 Patients were recorded in an emotional picture viewing task (Kuhn *et al.*, 2005; Huebl *et al.*,  
319 2016) 2 – 5 days after the first stage of the surgery for electrode implantation and prior to the  
320 second operation to connect the electrode to the subcutaneous pulse generator. During the  
321 task, participants were seated in the MEG scanner with a displaying monitor in front of them.  
322 Pictures selected from the Chinese Affective Pictures System (CAPS) (Bai *et al.*, 2005) were  
323 presented on the monitor in front of them. The emotional valence (1=unpleasant  $\Rightarrow$  5=neutral  
324  $\Rightarrow$  9=pleasant) and arousal (1 = calm  $\Rightarrow$  9 = exciting) of the pictures were previously rated by  
325 healthy Chinese participants (Bai *et al.*, 2005). The figures can be classified into three valence  
326 categories (neutral, positive and negative) according to the average score on emotional  
327 valence. In our paradigm, each experiment consisted of multiple blocks of 30 trials, with each  
328 block including 10 pictures of each valence category (neutral, positive and negative) in  
329 randomized order. Each trial started with a white cross ('+') presented with a black  
330 background for 1 second indicating the participants to get ready and pay attention, then a  
331 picture was presented in the center of the screen for 2 seconds. This was followed by a blank  
332 black screen presented for 3 to 4 second (randomized). The task was programmed using  
333 PsychoPy (<https://www.psychopy.org/>) with the timeline of each individual trial shown in Fig.



334 1A. The participants were reminded to pay attention to the pictures displayed on the monitor  
335 and they were instructed to try to experience the emotions the pictures conveyed. An  
336 additional neutral picture was presented randomly three times per block, upon which the  
337 patients were supposed to press a button to ensure constant attention during the paradigm. All  
338 participants completed 2 to 4 blocks of the paradigm and none of them missed any response to  
339 the additional figure indicating that they kept focus and that their working memory required  
340 for the task is normal. Pictures displayed to different participants are overlapped but not  
341 exactly the same, the average valence and arousal values of the displayed pictures are as  
342 shown in Fig. 1B. There were significant differences in the emotional valence scores, as well  
343 as in the arousal scores for the presented figures of the three emotional valence categories  
344 (one-way ANOVA followed by Bonferroni post hoc test,  $F_{2,24} = 14642.02$ ,  $p < 0.0001$  for the  
345 valence score, and  $F_{2,24} = 2102.55$ ,  $p < 0.0001$  for the arousal score). The positive figures  
346 have the highest valence scores and highest arousal scores; the negative figures have the  
347 lowest valence scores; whereas the neutral figures have lowest arousal scores.

348

## 349 **Data Acquisition**

350 Whole-brain MEG and LFP were simultaneously recorded at a sampling frequency of 1000  
351 Hz using a 306-channel, whole-head MEG system with integrated EEG channels (Elekta Oy,  
352 Helsinki, Finland). LFPs from all individual contacts (0, 1, 2, and 3, with 0 being the deepest  
353 contact) of the DBS electrodes were measured in monopolar mode with reference to a surface  
354 electrode attached to the earlobe or one of the most dorsal DBS contact. The MaxFilter

355 software (Elekta Oy, Helsinki, Finland) was used to apply the temporally extended signal  
356 space separation method (tSSS) to the original MEG data for removing the magnetic artefacts  
357 and movement artefacts (Taulu and Simola, 2006). The MEG and LFP recordings were  
358 synchronized with the timing of the onset of each picture stimuli through an analogue signal  
359 sent by the laptop running the picture viewing paradigm. The voltage of the analogue signal  
360 increased at the onset of the presentation of each picture and lasted for 500 ms before going  
361 back to zero. The voltage increase was different for pictures of different emotional valence  
362 category.

363

#### 364 **Reconstruction of Electrode Locations in the Habenula**

365 We used the Lead-DBS toolbox (Horn and Kuhn, 2015) to reconstruct the electrode  
366 trajectories and contact locations for all recorded patients (Fig. 2A). Post-operative CT was  
367 co-registered to pre-operative T1 MRI using a two-stage linear registration as implemented in  
368 Advanced Normalization Tools (ANT) (Avants *et al.*, 2008). CT and MRI were spatially  
369 normalized into MNI\_ICBM\_2009b\_NLIN\_ASYM space (Fonov *et al.*, 2011). Electrodes  
370 were automatically pre-localized in native and template space using the PaCER algorithm  
371 (Husch *et al.*, 2018) and then manually localized based on post-operative CT (Horn and Kuhn,  
372 2015).

373

#### 374 **LFP and MEG Data Analysis**

375 All data were analyzed using Matlab (R2013b) with FieldTrip (version 20170628)  
376 (Oostenveld *et al.*, 2011) and SPM8 toolboxes. Bipolar LFP recordings were constructed  
377 offline by subtracting the monopolar recordings from neighboring contacts on each electrode.  
378 One bipolar LFP channel within or closest to the habenula was selected from each recorded  
379 hemisphere for final analysis based on the post-operative imaging data and the location  
380 reconstruction based on Lead-DBS (Fig. 2A). Artefacts due to movement, flat and jump  
381 artefacts were visually inspected and manually marked during the pre-processing with  
382 FieldTrip. All the selected bipolar LFPs and MEG recordings were high-pass filtered at 0.3  
383 Hz, notch-filtered at 50 Hz and higher-order harmonics, low pass filtered at 100 Hz and then  
384 down-sampled to 250 Hz before further analysis. Eye blink and heartbeat artefacts in the  
385 MEG signals were identified by ICA and the low frequency, high amplitude components were  
386 removed from all MEG sensors. The MEG data of one subject (case 4) had to be discarded  
387 due to severe artefacts across all MEG channels. Hence, all reported results with MEG data  
388 are based on eight subjects.

389 The oscillatory activities in the habenula LFPs during rest were first investigated. The power  
390 spectra were calculated using the Fast Fourier Transform (FFT). We then applied the Fitting  
391 Oscillations and One-Over-F (FOOOF) algorithm (Haller *et al.*, 2018; Donoghue *et al.*, 2020)  
392 to separate the LFP power spectral densities into aperiodic (1/f-like component) and periodic  
393 oscillatory components which are modelled as Gaussian peaks. With this algorithm, a periodic  
394 oscillatory component is detected only when its peak power exceeds that of aperiodic activity  
395 by a specified threshold. In this study, the algorithm was applied to the 2-40 Hz range of the  
396 raw power spectra of the LFPs from each recorded hemisphere. We set the maximal number

397 of power peaks (`max_n_peaks`) to be four, the width of the oscillatory peak  
398 (`peak_width_limits`) to be between 1 and 15, and the threshold for detecting the peak  
399 (`peak_threshold`) to be 2. The goodness of fit was visually inspected for recordings from each  
400 hemisphere to make sure that the parameter settings worked well. After removing the  
401 aperiodic component, the periodic oscillatory components in the LFP power spectra were  
402 parameterized by their center frequency (defined as the mean of the Gaussian), amplitude  
403 (defined as the distance between the peak of the Gaussian and the aperiodic fit), and  
404 bandwidth (defined as two standard deviations of the fitted Gaussian) of the power peaks.

405 In the next step, we investigated the event-related power changes in the habenula LFPs and  
406 MEG signals in response to the presentation of figures of different emotional valence  
407 categories. All LFP and MEG signals were divided into event-related epochs aligned to the  
408 stimuli onset (-2500 to 4500 ms around the stimulus onset) and visually inspected for artefacts  
409 due to movement and other interferences. Trials with artefacts were removed from final  
410 analysis, leaving a mean number of 27 trials (range 18 – 30) for each valence category for  
411 each subject. A time-frequency decomposition using the wavelet transform-based approach  
412 with Morlet wavelet and cycle number of 6 was applied to each trial. We used a 500 ms buffer  
413 on both sides of the clipped data to reduce edge effects. The time-frequency representations  
414 were then averaged across trials of the same valence condition and baseline corrected to the  
415 average of pre-stimulus activity (-2000 to -200 ms) for each frequency band. Thus, resulting  
416 time-frequency values were percentage changes in power relative to the pre-stimulus baseline.

417

## 418 **MEG-specific Data Analysis**

419 Statistical comparison of power over a determined frequency band and time window between  
420 stimulus conditions across the group of subjects was performed to find topographical space  
421 difference. MEG source localization was conducted using a frequency domain beamforming  
422 approach. The dynamic imaging of coherent sources (DICS) beamformer in SPM8 with a  
423 single-shell forward model was used to generate maps of the source power difference between  
424 conditions on a 5 mm grid co-registered to MNI coordinates (Gross *et al.*, 2001). In this study,  
425 we focused our source analysis on the frequency band and time window identified by  
426 previous sensor-level power analysis to locate cortical sources of significant difference in the  
427 power response to negative and positive emotional stimuli.

428

## 429 **Cortical-Habenular Connectivity**

430 The functional connectivity between habenula and cortical areas was investigated using  
431 coherence analysis, which provides a frequency domain measure of the degree of co-  
432 variability between signals (Litvak *et al.*, 2010; Neumann *et al.*, 2015). First, time-resolved  
433 coherence in the theta/alpha frequency band between the habenula LFP and each MEG  
434 channel at sensor level were calculated using the wavelet transform-based approach with  
435 Morlet wavelet and cycle number of 6. Secondly, we determined the time window of interest  
436 by statistically comparing the sensor-level coherence between stimulus conditions. Third,  
437 cortical sources coherent with habenula-LFP activity in the determined frequency band and  
438 time window were located using DICS beamformer for each stimuli condition (Gross *et al.*,

439 2001; Litvak *et al.*, 2011).

440

#### 441 **Statistics**

442 A non-parametric cluster-based permutation approach (Maris and Oostenveld, 2007) was  
443 applied to normalized time-frequency matrices to identify clusters (time window and  
444 frequency band) with significant differences in the power changes induced by the presentation  
445 of pictures of different emotional valence. To achieve this, the original paired samples were  
446 randomly permuted 1000 times such that each pair was maintained but its assignment to the  
447 condition (negative or positive) may have changed to create a null-hypothesis distribution.  
448 For each permutation, the sum of the z-scores within suprathreshold-clusters (pre-cluster  
449 threshold:  $p < 0.05$ ) was computed to obtain a distribution of the 1000 largest suprathreshold-  
450 cluster values. If the sum of the z-scores within a suprathreshold-cluster of the original  
451 difference exceeded the 95th percentile of the permutation distribution, it was considered  
452 statistically significant. The average powers in the determined frequency band and time  
453 window identified by the cluster-based permutation method between different valence  
454 conditions were further compared using post-hoc paired t-test. A one-tailed dependent-sample  
455 t statistics and cluster-based permutation testing was applied to statistically quantify the  
456 differences in DICS source for power or source coherence between negative and positive  
457 emotional stimuli. In addition, linear mixed-effect modelling ('fitlme' in Matlab) with  
458 different recorded subjects as random effects was used to investigate the correlations between  
459 the observed changes in the neural signals and to investigate whether any changes we

460 observed in the neural activities were related to the ratings of the emotional valence or  
461 stimulus arousal of the stimuli. The estimated mean value and standard error of the fixed  
462 effect and associated p values, as well as the  $R^2$  value of the model were reported.

463

464 **Acknowledgements**

465 We would like thank Dr Wolf-Julian Neumann at Charité–University Medicine Berlin for the  
466 discussion on the paradigm and Yingying Zhang in the help of the emotion scaling.

467

468 **Funding**

469 CCY and BS were supported by NSCF (Grant No. 81571346, 82071547 and 81771482;  
470 National Natural Science Foundation of China). HT and PB were supported by the MRC  
471 (MR/P012272/1 and MC\_UU\_12024/1), the National Institute for Health Research Oxford  
472 Biomedical Research Centre and the Rosetrees Trust.

473

474 **Competing interests**

475 The authors report no biomedical financial interests or potential conflicts of interest.

476



## 477 **References**

- 478 Avants BB, Epstein CL, Grossman M, Gee JC. Symmetric diffeomorphic image registration  
479 with cross-correlation: evaluating automated labeling of elderly and neurodegenerative brain.  
480 *Med Image Anal* 2008; 12(1): 26-41.
- 481 Bai L, Ma H, Huang Y-X. The development of native Chinese affective picture system-a pretest  
482 in 46 college students. *Chinese Mental Health J* 2005; 11: 719-22.
- 483 Baldermann JC, Melzer C, Zapf A, Kohl S, Timmermann L, Tittgemeyer M, *et al.* Connectivity  
484 Profile Predictive of Effective Deep Brain Stimulation in Obsessive-Compulsive Disorder. *Biol*  
485 *Psychiatry* 2019; 85(9): 735-43.
- 486 Beraha E, Eggers J, Hindi Attar C, Gutwinski S, Schlagenhaut F, Stoy M, *et al.* Hemispheric  
487 asymmetry for affective stimulus processing in healthy subjects--a fMRI study. *PloS one* 2012;  
488 7(10): e46931.
- 489 Boraud T, Bezard E, Bioulac B, Gross C. High frequency stimulation of the internal Globus  
490 Pallidus (GPi) simultaneously improves parkinsonian symptoms and reduces the firing  
491 frequency of GPi neurons in the MPTP-treated monkey. *Neurosci Lett* 1996; 215(1): 17-20.
- 492 Bromberg-Martin ES, Hikosaka O. Lateral habenula neurons signal errors in the prediction of  
493 reward information. *Nat Neurosci* 2011; 14(9): 1209-16.
- 494 Caldecott-Hazard S, Mazziotta J, Phelps M. Cerebral correlates of depressed behavior in rats,  
495 visualized using 14C-2-deoxyglucose autoradiography. *J Neurosci* 1988; 8(6): 1951-61.
- 496 Canli T, Desmond JE, Zhao Z, Glover G, Gabrieli JD. Hemispheric asymmetry for emotional  
497 stimuli detected with fMRI. *Neuroreport* 1998; 9(14): 3233-9.
- 498 Chiken S, Nambu A. Mechanism of Deep Brain Stimulation: Inhibition, Excitation, or  
499 Disruption? *Neuroscientist* 2016; 22(3): 313-22.
- 500 Cui Y, Yang Y, Ni Z, Dong Y, Cai G, Foncelle A, *et al.* Astroglial Kir4.1 in the lateral habenula  
501 drives neuronal bursts in depression. *Nature* 2018; 554(7692): 323-7.
- 502 Davidson RJ. Anterior cerebral asymmetry and the nature of emotion. *Brain Cogn* 1992; 20(1):  
503 125-51.
- 504 Donoghue T, Haller M, Peterson EJ, Varma P, Sebastian P, Gao R, *et al.* Parameterizing neural  
505 power spectra into periodic and aperiodic components. *Nat Neurosci* 2020; 23(12): 1655-65.

- 506 Fakhoury M. The habenula in psychiatric disorders: More than three decades of translational  
507 investigation. *Neurosci Biobehav Rev* 2017; 83: 721-35.
- 508 Fonov V, Evans AC, Botteron K, Almli CR, McKinstry RC, Collins DL, *et al.* Unbiased average  
509 age-appropriate atlases for pediatric studies. *NeuroImage* 2011; 54(1): 313-27.
- 510 Friedman A, Lax E, Dikshtein Y, Abraham L, Flaumenhaft Y, Sudai E, *et al.* Electrical  
511 stimulation of the lateral habenula produces an inhibitory effect on sucrose self-administration.  
512 *Neuropharmacology* 2011; 60(2-3): 381-7.
- 513 Gainotti G. Unconscious processing of emotions and the right hemisphere. *Neuropsychologia*  
514 2012; 50(2): 205-18.
- 515 Gonzalez-Pardo H, Conejo NM, Lana G, Arias JL. Different brain networks underlying the  
516 acquisition and expression of contextual fear conditioning: a metabolic mapping study.  
517 *Neuroscience* 2012; 202: 234-42.
- 518 Gross J, Kujala J, Hamalainen M, Timmermann L, Schnitzler A, Salmelin R. Dynamic imaging  
519 of coherent sources: Studying neural interactions in the human brain. *Proc Natl Acad Sci U S*  
520 *A* 2001; 98(2): 694-9.
- 521 Haller M, Donoghue T, Peterson E, Varma P, Sebastian P, Gao R, *et al.* Parameterizing neural  
522 power spectra. *BioRxiv* 2018: 299859.
- 523 Herkenham M, Nauta WJ. Efferent connections of the habenular nuclei in the rat. *J Comp*  
524 *Neurol* 1979; 187(1): 19-47.
- 525 Hikosaka O. The habenula: from stress evasion to value-based decision-making. *Nat Rev*  
526 *Neurosci* 2010; 11(7): 503-13.
- 527 Hikosaka O, Sesack SR, Lecourtier L, Shepard PD. Habenula: crossroad between the basal  
528 ganglia and the limbic system. *J Neurosci* 2008; 28(46): 11825-9.
- 529 Hong S, Jhou TC, Smith M, Saleem KS, Hikosaka O. Negative reward signals from the lateral  
530 habenula to dopamine neurons are mediated by rostromedial tegmental nucleus in primates. *J*  
531 *Neurosci* 2011; 31(32): 11457-71.
- 532 Horn A, Kuhn AA. Lead-DBS: a toolbox for deep brain stimulation electrode localizations and  
533 visualizations. *NeuroImage* 2015; 107: 127-35.
- 534 Horn A, Reich M, Vorwerk J, Li N, Wenzel G, Fang Q, *et al.* Connectivity Predicts deep brain

535 stimulation outcome in Parkinson disease. *Ann Neurol* 2017; 82(1): 67-78.

536 Hu H, Cui Y, Yang Y. Circuits and functions of the lateral habenula in health and in disease. *Nat*  
537 *Rev Neurosci* 2020; 21(5): 277-95.

538 Huebl J, Brucke C, Merkl A, Bajbouj M, Schneider GH, Kuhn AA. Processing of emotional  
539 stimuli is reflected by modulations of beta band activity in the subgenual anterior cingulate  
540 cortex in patients with treatment resistant depression. *Soc Cogn Affect Neurosci* 2016; 11(8):  
541 1290-8.

542 Huebl J, Spitzer B, Brucke C, Schonecker T, Kupsch A, Alesch F, *et al.* Oscillatory subthalamic  
543 nucleus activity is modulated by dopamine during emotional processing in Parkinson's disease.  
544 *Cortex* 2014; 60: 69-81.

545 Husch A, M VP, Gemmar P, Goncalves J, Hertel F. PaCER - A fully automated method for  
546 electrode trajectory and contact reconstruction in deep brain stimulation. *Neuroimage Clin* 2018;  
547 17: 80-9.

548 Jakobs M, Pitzer C, Sartorius A, Unterberg A, Kiening K. Acute 5Hz deep brain stimulation of  
549 the lateral habenula is associated with depressive-like behavior in male wild-type Wistar rats.  
550 *Brain Res* 2019; 1721: 146283.

551 Ji H, Shepard PD. Lateral habenula stimulation inhibits rat midbrain dopamine neurons through  
552 a GABA(A) receptor-mediated mechanism. *J Neurosci* 2007; 27(26): 6923-30.

553 Kuhn AA, Hariz MI, Silberstein P, Tisch S, Kupsch A, Schneider GH, *et al.* Activation of the  
554 subthalamic region during emotional processing in Parkinson disease. *Neurology* 2005; 65(5):  
555 707-13.

556 Kuhn AA, Kempf F, Brucke C, Gaynor Doyle L, Martinez-Torres I, Pogosyan A, *et al.* High-  
557 frequency stimulation of the subthalamic nucleus suppresses oscillatory beta activity in patients  
558 with Parkinson's disease in parallel with improvement in motor performance. *J Neurosci* 2008;  
559 28(24): 6165-73.

560 Lawson RP, Nord CL, Seymour B, Thomas DL, Dayan P, Pilling S, *et al.* Disrupted habenula  
561 function in major depression. *Mol Psychiatry* 2017; 22(2): 202-8.

562 Lecca S, Pelosi A, Tchenio A, Moutkine I, Lujan R, Herve D, *et al.* Rescue of GABAB and  
563 GIRK function in the lateral habenula by protein phosphatase 2A inhibition ameliorates

564 depression-like phenotypes in mice. *Nat Med* 2016; 22(3): 254-61.

565 Li B, Piriz J, Mirrione M, Chung C, Proulx CD, Schulz D, *et al.* Synaptic potentiation onto  
566 habenula neurons in the learned helplessness model of depression. *Nature* 2011; 470(7335):  
567 535-9.

568 Li K, Zhou T, Liao L, Yang Z, Wong C, Henn F, *et al.* betaCaMKII in lateral habenula mediates  
569 core symptoms of depression. *Science* 2013; 341(6149): 1016-20.

570 Litvak V, Eusebio A, Jha A, Oostenveld R, Barnes GR, Penny WD, *et al.* Optimized  
571 beamforming for simultaneous MEG and intracranial local field potential recordings in deep  
572 brain stimulation patients. *NeuroImage* 2010; 50(4): 1578-88.

573 Litvak V, Jha A, Eusebio A, Oostenveld R, Foltynie T, Limousin P, *et al.* Resting oscillatory  
574 cortico-subthalamic connectivity in patients with Parkinson's disease. *Brain* 2011; 134(Pt 2):  
575 359-74.

576 Maris E, Oostenveld R. Nonparametric statistical testing of EEG- and MEG-data. *J Neurosci*  
577 *Methods* 2007; 164(1): 177-90.

578 Matsumoto M, Hikosaka O. Lateral habenula as a source of negative reward signals in  
579 dopamine neurons. *Nature* 2007; 447(7148): 1111-5.

580 Matsumoto M, Hikosaka O. Representation of negative motivational value in the primate lateral  
581 habenula. *Nat Neurosci* 2009; 12(1): 77-84.

582 Morris JS, Smith KA, Cowen PJ, Friston KJ, Dolan RJ. Covariation of activity in habenula and  
583 dorsal raphe nuclei following tryptophan depletion. *NeuroImage* 1999; 10(2): 163-72.

584 Neumann WJ, Jha A, Bock A, Huebl J, Horn A, Schneider GH, *et al.* Cortico-pallidal oscillatory  
585 connectivity in patients with dystonia. *Brain* 2015; 138(Pt 7): 1894-906.

586 Oostenveld R, Fries P, Maris E, Schoffelen JM. FieldTrip: Open source software for advanced  
587 analysis of MEG, EEG, and invasive electrophysiological data. *Comput Intell Neurosci* 2011;  
588 2011: 156869.

589 Oswal A, Beudel M, Zrinzo L, Limousin P, Hariz M, Foltynie T, *et al.* Deep brain stimulation  
590 modulates synchrony within spatially and spectrally distinct resting state networks in  
591 Parkinson's disease. *Brain* 2016; 139(Pt 5): 1482-96.

592 Pascual-Leone A, Catala MD, Pascual-Leone Pascual A. Lateralized effect of rapid-rate

593 transcranial magnetic stimulation of the prefrontal cortex on mood. *Neurology* 1996; 46(2):  
594 499-502.

595 Phillips ML, Drevets WC, Rauch SL, Lane R. Neurobiology of emotion perception I: The  
596 neural basis of normal emotion perception. *Biol Psychiatry* 2003a; 54(5): 504-14.

597 Phillips ML, Drevets WC, Rauch SL, Lane R. Neurobiology of emotion perception II:  
598 Implications for major psychiatric disorders. *Biol Psychiatry* 2003b; 54(5): 515-28.

599 Proulx CD, Hikosaka O, Malinow R. Reward processing by the lateral habenula in normal and  
600 depressive behaviors. *Nat Neurosci* 2014; 17(9): 1146-52.

601 Riva-Posse P, Choi KS, Holtzheimer PE, McIntyre CC, Gross RE, Chaturvedi A, *et al.* Defining  
602 critical white matter pathways mediating successful subcallosal cingulate deep brain  
603 stimulation for treatment-resistant depression. *Biol Psychiatry* 2014; 76(12): 963-9.

604 Sartorius A, Kiening KL, Kirsch P, von Gall CC, Haberkorn U, Unterberg AW, *et al.* Remission  
605 of major depression under deep brain stimulation of the lateral habenula in a therapy-refractory  
606 patient. *Biol Psychiatry* 2010; 67(2): e9-e11.

607 Savitz JB, Nugent AC, Bogers W, Roiser JP, Bain EE, Neumeister A, *et al.* Habenula volume  
608 in bipolar disorder and major depressive disorder: a high-resolution magnetic resonance  
609 imaging study. *Biol Psychiatry* 2011; 69(4): 336-43.

610 Shepard PD, Holcomb HH, Gold JM. Schizophrenia in translation: the presence of absence:  
611 habenular regulation of dopamine neurons and the encoding of negative outcomes. *Schizophr*  
612 *Bull* 2006; 32(3): 417-21.

613 Shumake J, Ilango A, Scheich H, Wetzell W, Ohl FW. Differential neuromodulation of  
614 acquisition and retrieval of avoidance learning by the lateral habenula and ventral tegmental  
615 area. *J Neurosci* 2010; 30(17): 5876-83.

616 Starkstein SE, Robinson RG, Price TR. Comparison of cortical and subcortical lesions in the  
617 production of poststroke mood disorders. *Brain* 1987; 110 ( Pt 4): 1045-59.

618 Taulu S, Simola J. Spatiotemporal signal space separation method for rejecting nearby  
619 interference in MEG measurements. *Phys Med Biol* 2006; 51(7): 1759-68.

620 Vadovicova K. Affective and cognitive prefrontal cortex projections to the lateral habenula in  
621 humans. *Front Hum Neurosci* 2014; 8: 819.

- 622 Velasquez KM, Molfese DL, Salas R. The role of the habenula in drug addiction. *Front Hum*  
623 *Neurosci* 2014; 8: 174.
- 624 Wang D, Li Y, Feng Q, Guo Q, Zhou J, Luo M. Learning shapes the aversion and reward  
625 responses of lateral habenula neurons. *eLife* 2017; 6.
- 626 Wang RY, Aghajanian GK. Physiological evidence for habenula as major link between forebrain  
627 and midbrain raphe. *Science* 1977; 197(4298): 89-91.
- 628 Wang Y, Zhang C, Zhang Y, Gong H, Li J, Jin H, *et al.* Habenula deep brain stimulation for  
629 intractable schizophrenia: a pilot study. *Neurosurg Focus* 2020; 49(1): E9.
- 630 Welter ML, Houeto JL, Bonnet AM, Bejjani PB, Mesnage V, Dormont D, *et al.* Effects of high-  
631 frequency stimulation on subthalamic neuronal activity in parkinsonian patients. *Arch Neurol*  
632 2004; 61(1): 89-96.
- 633 Wyczesany M, Capotosto P, Zappasodi F, Prete G. Hemispheric asymmetries and emotions:  
634 Evidence from effective connectivity. *Neuropsychologia* 2018; 121: 98-105.
- 635 Yamaguchi T, Danjo T, Pastan I, Hikida T, Nakanishi S. Distinct roles of segregated  
636 transmission of the septo-habenular pathway in anxiety and fear. *Neuron* 2013; 78(3): 537-44.
- 637 Yang Y, Cui Y, Sang K, Dong Y, Ni Z, Ma S, *et al.* Ketamine blocks bursting in the lateral  
638 habenula to rapidly relieve depression. *Nature* 2018a; 554(7692): 317-22.
- 639 Yang Y, Wang H, Hu J, Hu H. Lateral habenula in the pathophysiology of depression. *Curr Opin*  
640 *Neurobiol* 2018b; 48: 90-6.
- 641 Zhang C, Kim SG, Li D, Zhang Y, Li Y, Husch A, *et al.* Habenula deep brain stimulation for  
642 refractory bipolar disorder. *Brain Stimul* 2019; 12(5): 1298-300.

643

644

645

646 **Tables and Table Legends**

647 **Table 1. Characteristics of enrolled subjects.**

| Patient | Sex | Age<br>(years) | Duration<br>(years) | Disease | HAMD<br>score | BDI<br>score | Resting oscillation peaks |                 |
|---------|-----|----------------|---------------------|---------|---------------|--------------|---------------------------|-----------------|
|         |     |                |                     |         |               |              | L                         | R               |
| 1       | M   | 21             | 5                   | Schiz   | NA            | 32           | 9.1 Hz                    | 9.8 Hz          |
| 2       | M   | 21             | 5                   | Dep     | 12            | 10           | 7.9 Hz                    | 8.4 Hz          |
| 3       | M   | 44             | 10                  | Bipolar | 23            | 22           | 14.3 Hz                   | 15.9 Hz         |
| 4       | F   | 19             | 4                   | Schiz   | NA            | NA           | 10 Hz                     | 8.1 Hz          |
| 5       | M   | 21             | 3                   | Dep     | 24            | 38           | 7.1 Hz                    | 16.9 Hz         |
| 6       | M   | 16             | 2                   | Schiz   | NA            | 34           | 9.2 Hz; 13.0 Hz           | 7.2 Hz; 12.5 Hz |
| 7       | F   | 30             | 8                   | Bipolar | 21            | 33           | 6.1 Hz                    | 7.8 Hz          |
| 8       | F   | 28             | 13                  | Dep     | 28            | 37           | No peak                   | 8.0 Hz          |
| 9       | M   | 35             | 20                  | Dep     | 25            | 34           | 16.2 Hz                   | 7.9 Hz; 16.0 Hz |

648 Hab, habenula; F, female; M, male; Dep, depressive disorder; Bipolar, bipolar disorder; Schiz,  
649 schizophrenia; HAMD, Hamilton Depression Rating Scale (17 items); BDI, Beck Depression Inventory.  
650 Both HAMD and BDI were acquired before the surgery. NA, not available.

651

652 **Table 2. Linear mixed effect modelling details.**

| ID | Model                              | Fixed Effect of Valence |         | Fixed Effect of Arousal |         | R <sup>2</sup> |
|----|------------------------------------|-------------------------|---------|-------------------------|---------|----------------|
|    |                                    | k-Value                 | p-Value | k-Value                 | p-Value |                |
| 1  | <i>HabTheta1</i> ~                 | -2.8044 ±               | 0.0063  | -2.5221 ±               | 0.3247  | 0.6191         |
|    | <i>Valence + Arousal + 1 SubID</i> | 0.9840                  |         | 2.5363                  |         |                |
| 2  | <i>HabTheta2</i> ~                 | -4.4526 ±               | 0.0004  | 0.1975 ±                | 0.9483  | 0.2557         |
|    | <i>Valence + Arousal + 1 SubID</i> | 1.1753                  |         | 3.0295                  |         |                |
| 3  | <i>PFC_Theta</i> ~                 | -2.8921 ±               | 0.0069  | -3.6237 ±               | 0.1743  | 0.4368         |
|    | <i>Valence + Arousal + 1 SubID</i> | 1.0221                  |         | 2.6252                  |         |                |
| 4  | <i>rPFC_Hab_Coh</i> ~              | -6.1031 ±               | 0.0007  | 3.5242 ±                | 0.4180  | 0.2766         |
|    | <i>Valence + Arousal + 1 SubID</i> | 1.6785                  |         | 4.3112                  |         |                |

653 HabTheta1: Theta/Alpha band (5-10 Hz) in habenula LFPs at 100-500 ms

654 HabTheta2: Theta band (4-7 Hz) in habenula LFPs at 2700-3300 ms

655 PFC\_Theta: Theta/Alpha band (5-10 Hz) averaged across frontal sensors at 100-500 ms

656 rPFC\_Hab\_Coh: Theta/Alpha band (5-10 Hz) coherence between right PFC and habenula at 800-1300 ms

657 Valence: valence value for the displayed pictures (1 = unpleasant -> 5 = neutral -> 9 = pleasant)

658 Arousal: arousal value of the displayed pictures (1 = calm -> 9 = exciting)

659



660 **Figures and Figure Legends**

661

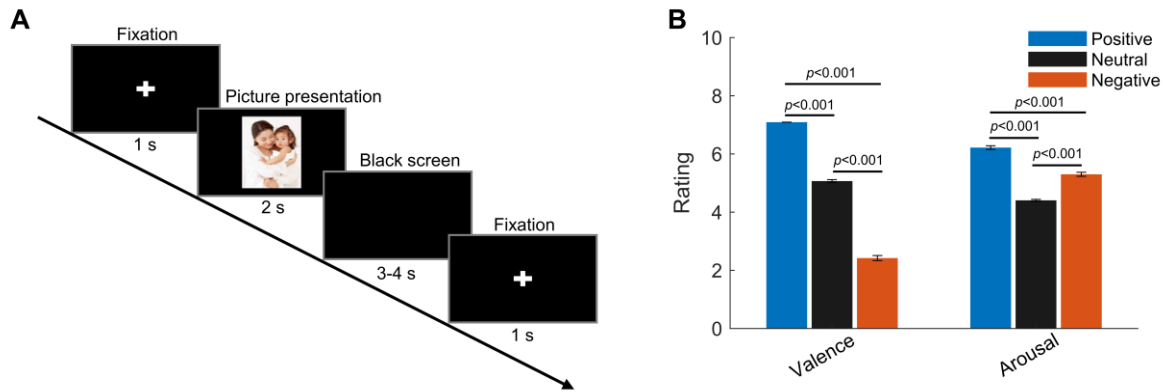

662

663 **Figure 1. Experimental paradigm and ratings (valence and arousal) of the presented**

664 **pictures.** (A) Timeline of one individual trial: Each trial started with a white cross ('+')

665 presented with black background for 1 second indicating the participants to get ready and pay

666 attention; then a picture was presented in the center of the screen for 2 seconds. This was

667 followed by a blank black screen presented for 3 to 4 second (randomized). (B) Valence and

668 arousal ratings for figures of the three emotional categories presented to the participants.

669 Valence: 1 = very negative; 9 = very positive; Arousal: 1 = very clam, 9 = very exciting. Error

670 bars indicate the standard deviation of the corresponding mean across participants (N = 9).

671

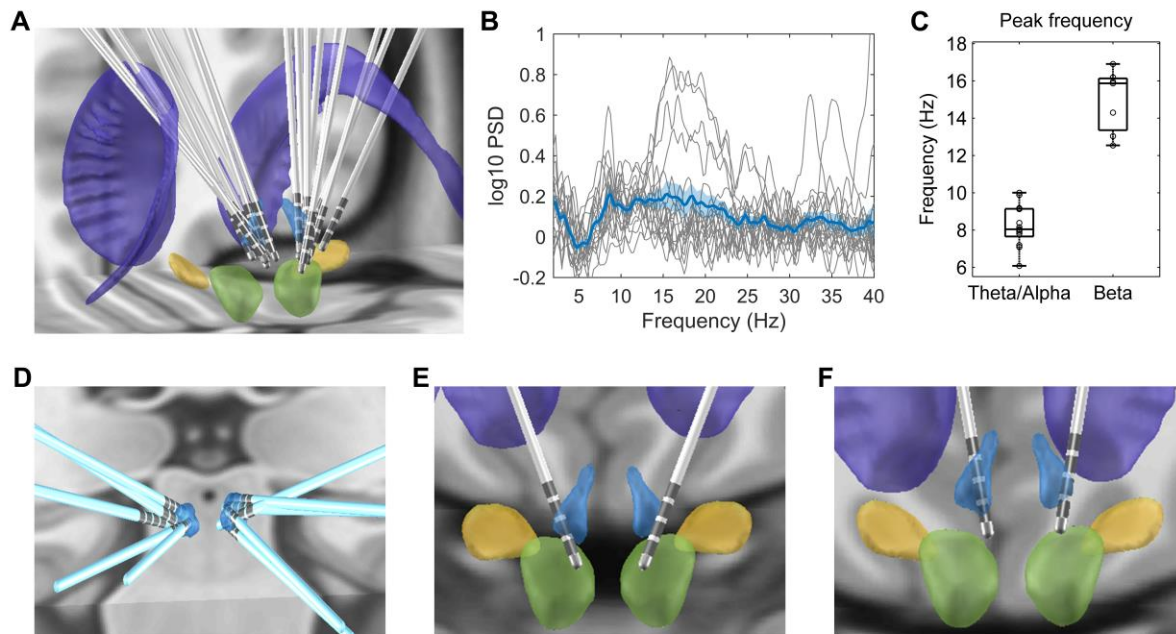

672

673 **Figure 2. Electrode location and spectral characteristics of LFPs from recorded habenula**

674 **at rest.** (A) Electrode locations reconstructed using Lead-DBS, with the structures colored in

675 light blue for the habenula, purple for the caudate nucleus, light green for the red nucleus, and

676 yellow for subthalamic nucleus. (B) The log-transformed oscillatory power spectra fitted using

677 *foof* method (after removing the non-oscillatory 1/f components). The bold blue line and

678 shadowed region indicates the mean ± SEM across all recorded hemispheres and the thin grey

679 lines show measurements from individual hemispheres. (C) Boxplot showing the peak

680 frequencies at theta/alpha and beta frequency bands from all recorded habenula. (D) Positions

681 of the electrodes with theta peaks only during rest. (E) Electrode positions for Case 3, in whom

682 only beta band peaks were detected in the resting activities from both sides. (F) Electrode

683 positions for Case 6, in whom both theta and beta band peaks were present in resting activities

684 from both sides.

685

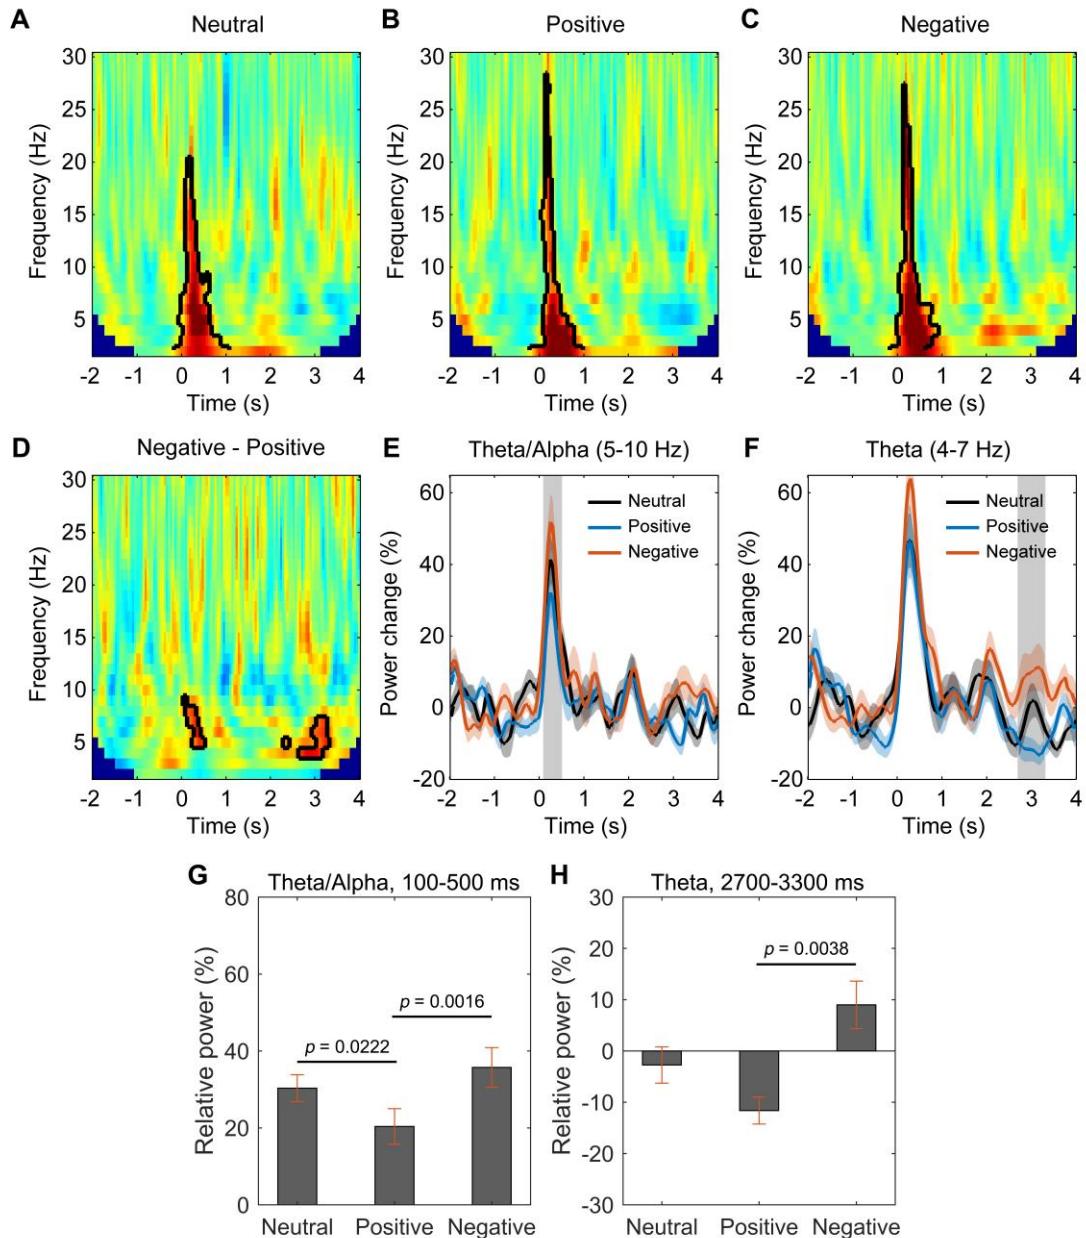

686

687 **Figure 3. Habenuular theta/alpha activity is differentially modulated by stimuli with**  
688 **positive and negative emotional valence (N = 18).** (A-C) Time-frequency representations of  
689 the power response relative to pre-stimulus baseline (-2000 to -200 ms) for neutral (A), positive  
690 (B), and negative (C) valence stimuli, respectively. Significant clusters ( $p < 0.05$ , non-  
691 parametric permutation test) are encircled with a solid black line. (D) Time-frequency  
692 representation of the power response difference between negative and positive valence stimuli,

693 showing significant increased activity the theta/alpha band (5-10 Hz) at short latency (100-500  
694 ms) and another increased theta activity (4-7 Hz) at long latencies (2700-3300 ms) with negative  
695 stimuli ( $p < 0.05$ , non-parametric permutation test). (E-F) Normalized power of the activities at  
696 theta/alpha (5-10 Hz) and theta (4-7 Hz) band over time. Significant difference between the  
697 negative and positive valence stimuli is marked by a shadowed bar ( $p < 0.05$ , corrected for  
698 multiple comparison). (G-H) The average spectral power relative to baseline activity in the  
699 identified time period and frequency band for different emotional valence conditions (5-10 Hz,  
700 100-500 ms; 4-7 Hz, 2700-3300 ms).

701

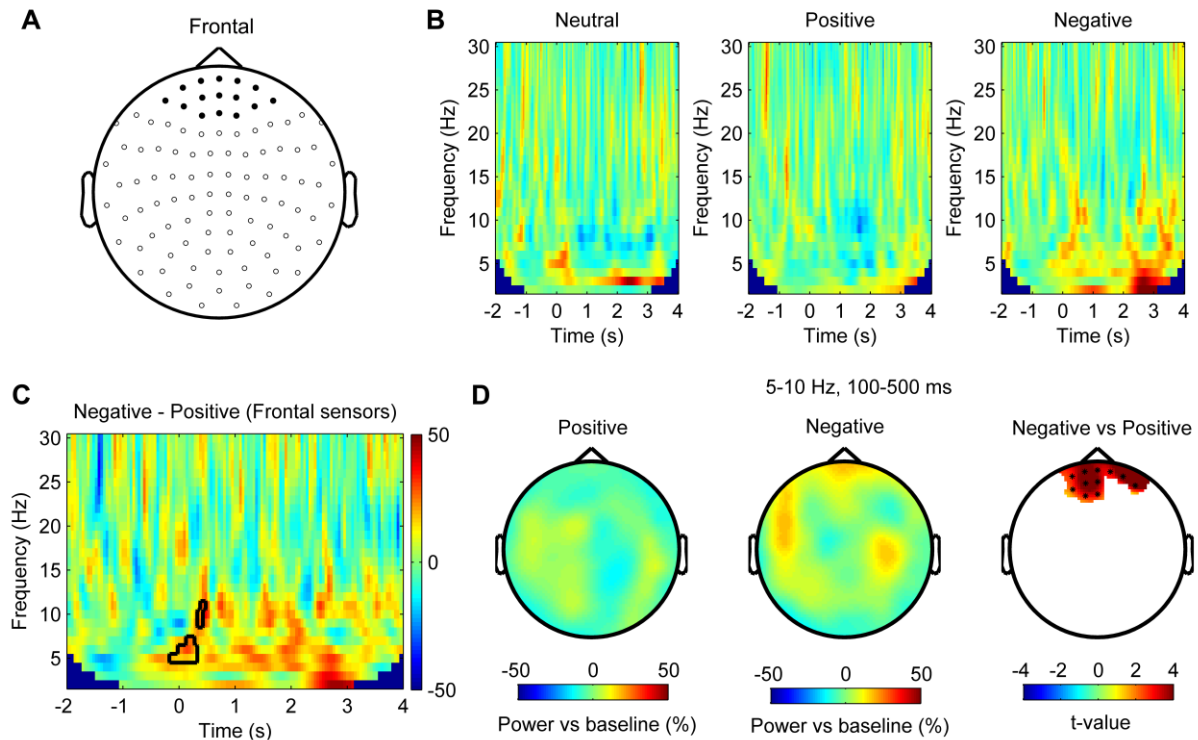

702

703 **Figure 4. Theta/Alpha oscillations in the prefrontal cortex are differentially modulated**

704 **by stimuli with positive and negative emotional valence (N = 8).** (A) Layout of the MEG

705 sensor positions and selected frontal sensors (dark spot). (B) Time-frequency representation of

706 the power changes relative to pre-stimulus baseline for neutral, positive and negative stimuli

707 averaged across frontal sensors (time 0 for stimuli onset). (C) Non-parametric permutation

708 test showed clusters in the theta/alpha band at short latency after stimuli onset with significant

709 difference ( $p < 0.05$ ) comparing negative and positive stimuli across frontal sensors. (D) Scalp

710 plot showing the power in the 5-10 Hz theta/alpha band activity at 100-500 ms after the onset

711 of positive (left), negative (middle) stimuli, and statistical t-values and sensors with

712 significant difference (right) at a 0.05 significance level (corrected for whole brain sensors).

713

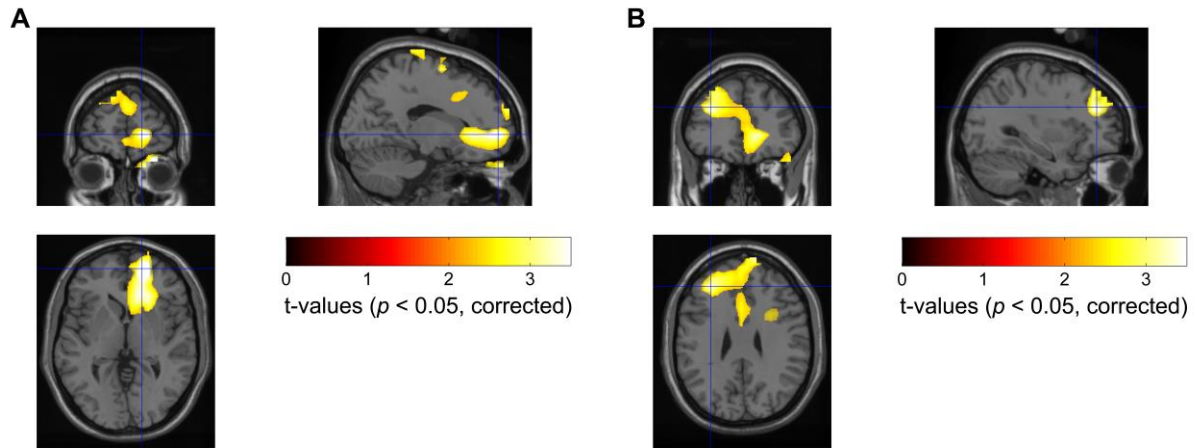

714

715 **Figure 5. Statistical source maps of t-values ( $p < 0.05$ ; corrected for whole brain) for the**

716 **comparison of theta/alpha band (5-10 Hz) power reactivity to negative vs. positive**

717 **emotional valence stimuli across subjects (N = 8). DICS beamformer was applied to the**

718 average theta/alpha band power changes from 100 to 500 ms after stimulus onset. The image

719 was transformed to MNI template space and overlaid on the template structural image. The

720 peak emotional valence induced differences in the theta/alpha power were localized in the right

721 Brodmann area 10, MNI coordinate [16, 56, 0] and left Brodmann area 9, MNI coordinate [-32,

722 38, 28].

723

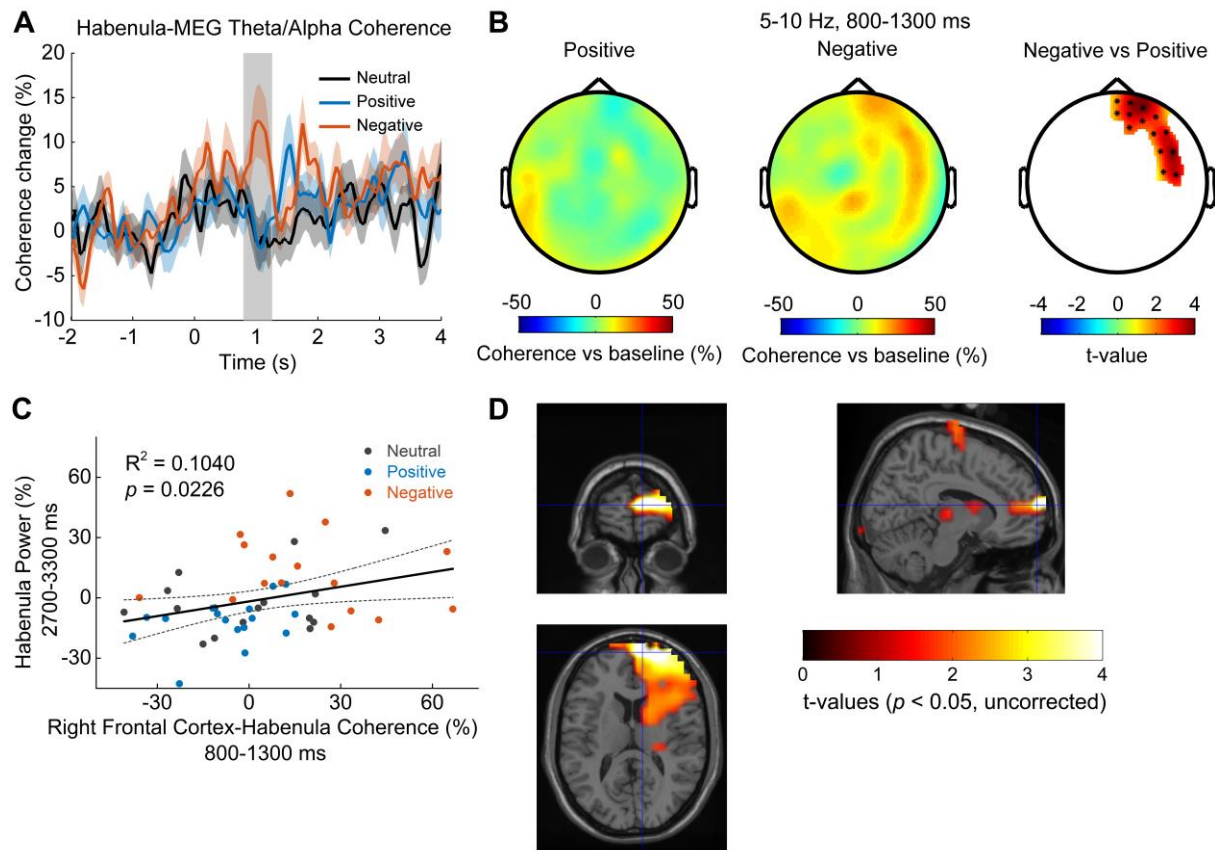

724

725 **Figure 6. Cortical-habenular coherence in the theta/alpha band is also differentially**

726 **modulated by stimuli with positive and negative emotional valence (N = 16). (A) Time-**

727 **varying theta (5-10 Hz) habenula-cortical coherence changes relative to pre-cue baseline**

728 **averaged across all MEG channel combinations for each recorded habenula. The thick colored**

729 **lines and shaded area show the mean and standard error across all recorded habenula. The**

730 **coherence was significantly higher at 800-1300 ms after the onset of negative emotional stimuli**

731 **compared to positive stimuli (rectangular shadow showing the time window with  $p < 0.05$ ). (B)**

732 **Scalp plot showing the cortical-habenula coherence in the theta band during the identified time**

733 **window (800-1300 ms) for positive stimuli (left), negative stimuli (middle), and statistical t-**

734 **values and sensors with significant difference (right) masked at  $p < 0.05$  (corrected for whole**

735 **brain sensors). (C) The increase in the theta band coherence between right frontal cortex and**

736 habenula at 800-1300 ms correlated with the theta increase in habenula at 2700-3300 ms after  
737 stimuli onset; (D) Statistical source maps of t-values ( $p < 0.05$ ; uncorrected) for the comparison  
738 of theta/alpha coherence response in the time window of 800 to 1300 ms between negative  
739 stimuli with positive stimuli. The peak coherence differences were mainly localized in the right  
740 Brodmann area 10, MNI coordinate [10, 64, 12].
